# Evolutionary mysteries in meiosis

Thomas Lenormand<sup>1</sup>, Jan Engelstädter<sup>2</sup>, Susan E. Johnston<sup>3</sup>, Erik Wijnker<sup>4</sup>, Christoph R. Haag<sup>1</sup>

<sup>1</sup> Centre d'Ecologie Fonctionnelle et Evolutive (CEFE)–Unité Mixte de Recherche 5175, Centre National de la Recherche Scientifique (CNRS)–Université de Montpellier–Université Paul-Valéry Montpellier–Ecole Pratique des Hautes Etudes (EPHE), campus CNRS, 1919 Route de Mende, 34293 Montpellier Cedex 5, France

<sup>2</sup> School of Biological Sciences, The University of Queensland, Brisbane, QLD 4072, Australia

<sup>3</sup> Institute of Evolutionary Biology, University of Edinburgh, Charlotte Auerbach Road, Edinburgh EH9 3FL, United Kingdom

<sup>4</sup> Laboratory of Genetics, Wageningen University, Droevendaalsesteeg 1, 6708 PB Wageningen, the Netherlands

Keywords: genetic conflicts, recombination, two-step meiosis, polyploidy, inverted meiosis, automixis, epigenetic resetting, asymmetrical meiosis, meiosis fairness, crossover interference, hotspots, heterochiasmy.

## Abstract

Meiosis is a key event of sexual life cycles in eukaryotes. Its mechanistic details have been uncovered in several model organisms and most of its essential features have received various and often contradictory evolutionarily interpretations. In this perspective, we present an overview of these often “weird” features. We discuss the origin of meiosis (origin of ploidy reduction and recombination, two-step meiosis), its secondary modifications (in polyploids or asexuals, inverted meiosis), its importance in punctuating life cycles (meiotic arrests, epigenetic resetting, meiotic asymmetry, meiotic fairness) and features associated with recombination (disjunction constraints, heterochiasmy, crossover interference and hotspots). We present the various evolutionary scenarios and selective pressures that have been proposed to account for these features and we highlight that their evolutionary significance often remains largely mysterious. Resolving these mysteries will likely provide decisive steps towards understanding why sex and recombination is found in the majority of eukaryotes.

## Introduction

In eukaryotic sexual life cycles, haploid cells fuse to give rise to diploids, before diploid cells are converted back to haploids in a process known as meiosis. Meiosis reduces a cell's chromosome number by half, whilst also creating new allele combinations distributed across daughter cells through segregation and recombination. This genetic reshuffling reduces genetic associations within and between loci and is thought to be the basis of the success of sexual reproduction. Mechanistic studies of meiosis have been carried out in different fields, such as cell biology, genetics and epigenetics, encompassing a wide range of eukaryotes. However, these studies rarely focus on the evolutionary significance of meiotic mechanisms, rather mentioning them in passing and often in a simplified manner. In evolutionary biology studies, meiosis is also often simplified and represented by random assortment of chromosomes and recombination maps expressing the probability of recombination events between ordered loci, with little attention to the molecular and cellular details. While these simplifications are legitimate and useful in many cases, the wealth of mechanistic findings being uncovered points to a considerable number of evolutionary puzzles surrounding meiosis that have yet to be resolved. Indeed, in the following perspective, we will show that close scrutiny of almost every aspect of meiosis will reveal “weird” features that constitute evolutionary mysteries.

### 1. The origins of meiosis.

The origin of meiosis through gradual steps is among the most intriguing evolutionary enigmas [1,2]. Meiosis is one of the ‘major innovations’ of eukaryotic life that evolved before their subsequent radiation over one billion years ago [3–5]. Extant eukaryotes share a set of genes specifically associated with meiosis, implying that meiosis evolved only once before their last common ancestor [6,7]. Identifying the selective scenario that led to its early evolution is difficult, but clues can be obtained by determining (i) which mitotic cellular processes were re-used in meiosis (e.g. DNA repair through homologous recombination and possibly reduction), (ii) which selective steps were involved in the assembly of the full cellular process, and (iii) why different forms of ‘meiosis’ were perhaps less successful.

#### 1.1 The origin of ploidy reduction.

A form of reductional cell division (a.k.a ‘proto-meiosis’) probably evolved in early asexual unicellular eukaryotes. Two scenarios for this have been proposed. The first is

that diploidy accidentally occurred by replication of the nuclear genome without subsequent cell division (“endoreplication”) [8–12], and that returning to haploidy was selected for to correct this. Because either haploidy or higher ploidy levels may be favoured in different ecological situations [13,14], a variant of this scenario is that a proto-meiosis–endoreplication cycle evolved to switch between ploidy levels [5]. The resulting life cycle may have resembled modern ‘parasexual’ fungi in which diploid cells lose chromosomes in subsequent mitotic divisions, leading to haploidy via aneuploid intermediates [15]. Many other modern eukaryotes also increase and decrease their ploidy somatically, depending on growth stage or stress [16]. The second scenario is that proto-meiosis evolved in response to the fusion of two haploid cells (“syngamy”), as in standard modern eukaryotic sexual life cycles. Syngamy may have been favoured because it allows recessive deleterious mutations to be masked in diploids [1,12]. A difficulty with this idea is that such masking may not be sufficient to favour diploidy in asexuals [17]. In a variant of this scenario, early syngamy evolved as a result of ‘manipulation’ by selfish elements (plasmids, transposons) to promote their horizontal transmission [18]. In support of this view, mating-type switching (which can allow syngamy in haploid colonies) has evolved multiple times in yeasts and involves domesticated mobile genetic elements [19].

## 1.2 The origin of synapsis and meiotic recombination.

During meiosis, crossover recombination results from the pairing of homologous chromosomes and the formation of DNA double-strand breaks (DSBs), followed by synapsis, a process in which homologues become tightly paired along their length involving a protein structure known as the synaptonemal complex [20]. DSBs are then repaired as either crossovers (hereafter ‘COs’), resulting in the exchange of large chromatid segments, or gene-conversion events [21]. Most evidence suggests that homologous recombination evolved long before meiosis, as it occurs in all domains of life and involves proteins that share strong homology [22,23], but the origins and selective advantage of synapsis, gene conversion and recombination remain poorly understood [24]. One hypothesis is that meiotic pairing and extensive homologous recombination in meiosis evolved to avoid the burden and consequences of non-allelic ectopic recombination in the large genomes of early eukaryotes, which have repetitive sequences [9,25,26]. Such sequences might have been related to the spread of retrotransposons in early eukaryotes, of which many types are very ancient in eukaryotes but absent in bacteria and archaea [27]. Another hypothesis is that pairing

and recombination initially arose as a way to repair mutational damage caused by increased oxidative stress due to rising atmospheric oxygen or endosymbiosis [7,28–30]. This scenario presupposes that DNA maintenance is inefficient in the absence of meiosis; however, prokaryotes (including archaea) have efficient repair mechanisms that involve recombination but not meiosis [9]. In addition, this scenario does not fit well with the observation that a large number of DSBs are actively generated at the onset of meiosis [1,31].

### 1.3 The origin of two-step meiosis.

A particular feature of meiosis is that it starts with a chromosome doubling ( $2n \rightarrow 4n$ ) before meiosis I ( $4n \rightarrow 2(2n)$ ) and II ( $2(2n) \rightarrow 4(n)$ ) occur. For ploidy reduction, the initial steps appear superfluous [32]. A simpler single-step cell division ( $2n \rightarrow 2(n)$ ), without the initial DNA replication phase, could in principle achieve ploidy reduction. Recombination may not be a crucial difference between one- and two-step meiosis as both can involve COs, even if, with one CO, the two meiotic products carry recombinant chromosomes in one-step meiosis, whereas only two out of four are recombinant in two-step-meiosis [33]. Three hypotheses have been proposed to account for two-step meiosis. The first postulates that two-step meiosis better protects against particular selfish genetic elements (SGEs) that increase their transmission frequencies by sabotaging the meiotic products in which they do not end up (known as ‘sister killers’) [34]. In a two-step meiosis, there is uncertainty as to whether the reductional division is meiosis I or II, meaning that the sabotage mechanism has a much reduced efficacy. Microsporidia and red algae show specific modifications to meiosis that increase such uncertainty even more [35]. However, such sister killers are hypothetical, and remain undocumented, and theoretical studies, based on assumptions about how different killers might, act suggest that this mechanism does not inevitably promote the development of a two-step meiosis [36]. The second hypothesis is that sexual species with one-step-meiosis would be vulnerable to invasion by asexual mutants, and have thus gone disproportionately extinct in the past. Contrary to one-step meiosis, most automictic modifications of two-step meiosis involve loss of heterozygosity each generation (see section 2.3), which would cause expression of recessive and partially recessive deleterious mutational effects and reduce the fitness of newly emerging asexual mutants [33]. Finally a third hypothesis posits that a one-step-meiosis is more complex and thus less likely to evolve than a two-step-meiosis [9]. Mitotic and meiotic cell cycles start similarly with DNA replication in response to increasing cyclin

dependent kinase (CDK) activity. Two-step meiosis can be achieved simply by modulating CDK activity at the end of a cell cycle to add a second division event [37]. In contrast, a one-step meiosis would require extensive modification of the mitotic cycle; despite earlier suggestions of its presence in some basal eukaryotes (protists) [8,38], there are presently no firm indications that one-step meioses exist in nature [35,39].

## 2. Secondary modifications of meiosis.

Meiosis is remarkably conserved across eukaryotes. Nevertheless, in many species, variants exist that may offer insights into the evolutionary origins and mechanistic constraints of meiosis. Here, we discuss three of these modifications: meiosis in polyploids, inverted meiosis and meiosis in asexual organisms.

### 2.1 Meiosis and polyploidy.

Polyploidy is surprisingly common in eukaryotes given the considerable problems it poses to meiosis [40–42]. In diploids, homologous chromosomes recognise each other and align to form bivalents during Prophase I, but when there are three or more chromosomes with sufficient homology, these chromosomes may all align to varying degrees and form multivalents. This can occur when all chromosome sets originate from the same species (autopolyploidy) but also when polyploidy is a result of hybridisation (allopolyploidy). Multivalent formation is often associated with mis-segregation of chromosomes as well as chromosomal rearrangements arising from recombination within multivalents, leading to reduced fertility and low-fitness offspring [e.g. 43,44,45]. These problems may be compounded because recombination homogenises partially differentiated chromosomes, thereby further increasing the likelihood that they will pair [the ‘polyploid ratchet’: 46].

Given these detrimental effects, the existence of successful polyploid species and lineages indicates that natural selection can often promote transitions from multi- to bivalents that then segregate as in diploids [e.g. 47,48]. However, how such transitions are achieved at the molecular level remains a mystery. Part of the answer seems to be a reduction in the number of COs, since multivalents can only form with at least two COs per chromosome [48–50]. There is also mounting evidence for genes that have been selected to control pairing behaviour of chromosomes during meiosis, such as *ph1* in hexaploid wheat [51] and several candidate genes in polyploid *Arabidopsis* [48,52]. Polyploidy with odd numbers of chromosome sets poses an even greater problem

because aneuploid gametes are generally produced [e.g. 53]. However, there are some plant species where solutions to even this problem have evolved and odd-number polyploidy appears to persist stably. In these species, the problem of unequal segregation during meiosis is solved through exclusion of univalents in one sex but inclusion in the other, leading, for example, to haploid sperm and tetraploid eggs in pentaploid dogroses [54].

## 2.2 Inverted meiosis.

In normal meiosis, homologous chromosomes are separated during meiotic division I whereas sister chromatids are separated during meiosis II. Why meiosis generally follows this order is unknown, but interestingly, meiosis can also take place in the reverse order in some species, including some flowering plants [55–57], mites [58], true bugs [59], and mealybugs [60]. All species with inverted meiosis described to date seem to have holocentric chromosomes (i.e., kinetochores are assembled along the entire chromosome rather than at localised centromeres). Inverted meiosis is viewed as a possible solution to specific problems of kinetochore geometry in such meiosis [61]. Thus, intriguing as they are, these systems provide little insight into why inverted meiosis is absent or very rare in monocentric species.

It is conceivable that a reverse order of divisions would make meiosis more vulnerable to exploitation by meiotic drive or sister killer SGEs, but to the best of our knowledge, there is currently neither theoretical nor empirical support for this idea. Another possibility is that meiosis I tends to be reductional because it allows for DSB repair by sister chromatid exchange in arrested female meiosis [62]. Alternatively, the order of meiotic divisions could merely be a ‘frozen accident’, i.e., a solution that has been arrived at a long time ago by chance, and that reversal is difficult (at least with monocentric chromosomes). A recent paper investigating human female meioses in unprecedented detail casts doubt on this view [63]. The careful genotyping of eggs (or embryos) and polar bodies at many markers indicated that the most common aberrant segregation pattern of chromosomes in humans corresponded to that seen in inverted meiosis. The question of why one order of meiotic divisions is almost universal therefore remains unresolved.

## 2.3 Meiosis modifications and loss of sex.

Many organisms have abandoned canonical sexual reproduction, reproducing asexually by suppressing or modifying meiosis and producing diploid eggs that can develop without fertilisation. This raises two connected mysteries: why are some types of modifications much more frequent than others, and how can mitotic (or mitosis-like)

asexual reproduction (“apomixis” or “clonal parthenogenesis” in animals, “mitotic apomixis” in plants) evolve from meiosis. Examples of meiosis-derived modes of asexual reproduction include chromosome doubling prior to meiosis (“endomitosis” or “pre-meiotic doubling”), fusion of two of the four products of a single meiosis (“automixis” in animals, “within-tetrad mating” in fungi), and suppression of one of the two meiotic divisions (included under “automixis” or “meiotic apomixis”, depending on the author); see [64–70] for detailed descriptions of these processes.

Two particularly common modes of asexuality are suppression of meiosis I, and automixis involving fusing meiotic products that were separated during meiosis I (“central fusion”). Both are genetically equivalent and lead to reduced heterozygosity when there is recombination between a locus and the centromere of the chromosome on which it is located. Most other forms of meiosis-derived asexual reproduction lead to a much stronger reduction in offspring heterozygosity [71–75], and it has been hypothesised that the reduced fitness of homozygous progeny explains the rarity of these other forms [67,74,76]. Indirect support comes from the observation that species with regular asexual reproduction usually do so by central fusion or suppression of meiosis I, often accompanied by very low levels of recombination, thus maintaining heterozygosity. In contrast, species that only rarely reproduce asexually show a wider variety of asexual modes and higher levels of recombination [1,67,69,77,78]. Nonetheless, this hypothesis cannot explain some observations, for instance the rarity of pre-meiotic doubling with sister-chromosome pairing, which would also efficiently maintain heterozygosity [67]. Perhaps evolving a mechanism that ensures sister-pairing is difficult, though it seems to occur at least in some lizard species [79].

The question of how a mitotic asexual mutant can invade a sexual species is at the heart of the debate on the evolutionary maintenance of sex, as this is what is investigated in most theoretical models, and is the situation where the cost of sex is most evident [1]. However, unless meiosis can be entirely bypassed (as e.g. with vegetative reproduction), secondary asexuality is likely to evolve via modification of meiosis, keeping much of the cell signalling and machinery intact [65,76,80,81, see also section 3]. Indeed, detailed cytological and genetic investigations in several asexual species thought to reproduce clonally by mitotic apomixis have uncovered remnants of meiosis [69,82–84]. In *Daphnia*, meiosis I is aborted mid-way and a normal meiosis II follows. Hence, clonality in *Daphnia* is meiotically derived [82]. This should lead to loss of heterozygosity in centromere-distal regions, but if recombination is fully suppressed the genetic outcome



resembles mitosis. Importantly, this suggests a possible stepwise route to evolution of mitosis-like asexuality. Rare automixis (spontaneous development of unfertilised eggs) occurs in many species [1,77]. If this becomes more common, forms of automixis maintaining heterozygosity in centromere regions might be selectively favoured and recombination suppressed, eventually leading to meiosis-derived asexuality with the same genetic consequences as mitosis [80,81,85–87]. In plants, this can be achieved artificially by mutation of one or a combination of three genes [88–90]. To fully understand the evolutionary maintenance of sex, we may therefore need to understand the selection pressures acting in the intermediate stages, which probably involve loss of heterozygosity, and thus inbreeding depression [73,76]. In many cases, the initial evolution of asexuality may thus resemble the evolution of self-fertilisation, and several traits may pre-exist (such as low recombination rates) that make the successful transition to asexuality more likely in some taxa.

### 3. Meiosis punctuates life cycles.

Meiosis is a key step in sexual life cycles, as well as some asexual life cycles derived from sexual ancestors. In multicellular eukaryotes, where meiosis is tightly associated with reproduction (unlike in many protists), meiosis is also a cellular and genetic bottleneck at the critical transition between the diploid and the haploid phases.

#### 3.1 Meiosis timing and arrest.

In early haploid eukaryotes, meiosis probably quickly followed endomitosis or syngamy. Today, multicellular eukaryotes exhibit a variety of life cycles in which the haploid or diploid phase may predominate. The duration of the different phases was perhaps initially controlled in part by the timing of meiosis -- for instance, a multicellular, extended diploid phase likely evolved by postponing meiosis. However, in metazoans, life cycles are mostly determined by the extent of somatic development within each phase rather than by the timing of meiosis, which can be halted or postponed. In animals, where haploid mitosis is suppressed, syngamy immediately follows meiosis. Furthermore, specific cells are ‘destined’ at an early stage to eventually undergo meiosis (a.k.a germline), whereas this cell fate is determined much later in fungi, plants and some algae.

The timing of meiosis in the germ line of animals has been intensively investigated. Whereas male meiosis occurs continuously, female meiosis usually stops twice. These



‘meiotic arrests’ are under the control of various factors that are not completely identified across animals [91–93]. Arrest 1 occurs in prophase I during early development and can last years until sexual maturity. The timing of arrest 2 is more variable (ranging from metaphase I in many invertebrates to metaphase II in vertebrates and G1 phase after meiosis II in some echinoderms), and may have evolved to prevent the risk of premature parthenogenetic cleavage of oocytes or inappropriate DNA replication before fertilisation [93,94]; this is supported by the fact that this arrest is usually released by fertilisation. However, the evolutionary significance of its precise timing in diverse groups is not well understood. Three ideas have been put forward to explain arrest 1 [62]. First, its occurrence at prophase I may allow the repair of accidental DSBs by sister chromatid exchange during long periods between arrests 1 and 2. Second, if arrest 1 was to occur during an earlier mitotic division within the germline, this might decrease the variance in the number of deleterious mutations among gametes within individuals, which may be detrimental if some defective gametes or early embryos can be eliminated and replaced during reproduction. Third, it may be easier to prevent uncontrolled proliferation in a non-dividing meiotic oocyte, as once the cell starts the meiotic cell division, it cannot engage in further mitotic divisions. Arrest 1 may thus have evolved to control (and minimise) the number of possibly wasteful and mutagenic mitotic divisions in the female germline. Similar meiotic arrests in plants are unknown. Plants seem to completely lack strict mechanisms to arrest the meiotic cell division. Contrary to animals and fungi that for example arrest the cell cycle and abort meiosis once DSBs are not repaired, plants will progress through meiosis irrespective of such major defects [37].

### 3.2 Meiosis and epigenetic reset.

Meiosis and syngamy represent critical transitions between haploid and diploid phases in each generation. It has been suggested that a primary function of meiosis is to allow for epigenetic resetting in eukaryotes [95]. For instance, metazoan development is under the control of many epigenetic changes (cytosine methylation and chromatin marks) that are irreversibly maintained throughout life and must be reset twice each generation (at the  $n \rightarrow 2n$  and  $2n \rightarrow n$  transitions). This ensures proper development, the acquisition of parent-specific imprints, and might allow for mechanisms limiting the maximal number of possible successive mitoses (“Hayflick limit”, reducing tumour development [95]). There are exceptions, and some genes specifically escape an epigenetic  $2n \rightarrow n$  ‘meiotic resetting’, leading to transgenerational epigenetic inheritance [96]. Also, although the  $2n \rightarrow n$  resetting occurs at meiosis in some cases (e.g. in female

meiosis in animals), its timing may not be strictly tied to meiosis. For instance, it can occur pre-meiotically in the male germ line of animals or post-meiotically in male plant gametophytes [96].

The evolutionary significance of these timing differences are poorly understood. Meiosis may simply not be the optimal time for epigenetic resetting. Many epigenetic pathways repress the activity of transposable elements (TEs), and so resetting epigenetic marks exposes the genome to mobilisation of these elements, which may be particularly detrimental when producing gametes. In addition, meiosis may be specifically vulnerable to TE activity for several reasons [97,98]. These include (1) deficient synapsis and repair due to the reshuffling of meiotic machinery towards TEs-induced DSBs, (2) ectopic recombination among TEs, (3) interference with synapsis due to TE transcriptional activity. Alternative TE silencing mechanisms, such as those involving small RNAs, may have evolved to ensure proper TE control during epigenetic resetting. For example, these mechanisms involve piRNA and/or endo-siRNA in mammal male and female germ lines, respectively [99], and transfer of siRNA from the central cell to the egg cell in plant female gametophytes [100]. It is also possible that stringent synapsis checkpoints evolved, in part, to prevent the formation of defective gametes due to TE activity, along with other possible causes of meiotic errors.

### 3.3 Meiosis asymmetry.

Symmetrical meiosis results in four viable gametes, whereas asymmetrical meiosis results a single one. Symmetrical meiosis is ancestral, and found in male meiosis in animals, seed plants, 'homosporous' species (e.g. mosses, many ferns) and isogamous eukaryotes. Asymmetrical meiosis, on the other hand, has evolved multiple times, and occurs in female meiosis in animals, seed plants and some ciliates. The selective scenarios underlying the evolution of meiotic asymmetry are unresolved. In some cases, such as in ciliates, there is no requirement for four meiotic products, as sex occurs by the cytoplasmic exchange of haploid micronuclei ("conjugation"). In other cases, asymmetrical meiosis in females results in a large oocyte full of resources, which may favour the production of a single cell rather than four [62,101,102]. However, females could achieve this symmetrically by undergoing fewer meioses. Possibly, therefore, asymmetrical meiosis allows better control of resource allocation to oocytes, as symmetrical meiosis may not ensure an even distribution of resources across four meiocytes; one difficulty here is that it is not clear why female control of resource allocation would be more efficient among meiocytes derived from the same or different

meiosis. A solution may be that meiocytes must compete for resources during meiosis, so that a symmetrical female meiosis is vulnerable to SGEs that bias resource allocation in their favour, possibly by killing other products of meiosis [102]. Asymmetrical meiosis may therefore have evolved to suppress such costly competition within tetrads [103], but as discussed in the next section, it also opens possibility of new conflicts [102]. Hence, the evolution of asymmetrical female meiosis is a question that remains not entirely resolved.

### 3.4 Fairness of meiosis.

A striking feature of meiosis is its apparent fairness: under Mendel's first law of inheritance, each allele has a 50% chance of ending up in any given gamete. However, there are many SGEs that increase their chances above 50% by subverting the mechanism of meiosis. These SGEs fall into two classes. Killer SGEs kill cells that have not inherited the element. In principle, such killers could operate during meiosis (the hypothetical 'sister killers' as discussed above), but the numerous killer SGEs that have so far been described operate postmeiotically, e.g. by killing sibling sperm [104–107]. The second class of SGEs consists of meiotic drivers that exploit the asymmetry of female meiosis discussed in the previous section. These elements achieve transmission in excess of 50% by preferentially moving into the meiotic products that will eventually become the eggs or megaspores [105,108]. As this last example illustrates, there is a formal similitude between SGEs biasing resource allocation in their favour and more classical 'meiotic drive' [109]. Parents make decisions of allocations to offspring before the "meiotic veil of ignorance", whereas offspring compete for resources "from behind the veil" [110,111]. These parent-offspring conflicts are likely at the origin of parental imprints that occur on some genes at or just before meiosis.

SGEs that undermine the fairness of meiosis provide explanations for otherwise puzzling observations. Perhaps most strikingly, centromere DNA regions often evolve rapidly, in contrast to what one would expect given their important and conserved function in meiosis. Henikoff *et al.* [112] therefore proposed that expansion of repeat sequences in centromeric DNA produces a "stronger" centromere, with increased kinetochore binding, which exhibits drive towards the future egg during meiosis I and consequently spreads in the population. Some of the best support for this hypothesis comes from a female meiotic driver in the monkeyflower *Mimulus guttatus* [113]. Although conclusive evidence for a direct centromere function of this element is lacking, it is physically associated with large centromere-specific satellite DNA arrays [114]. Female meiotic drive may also explain rapid karyotype evolution and the distribution of meta- vs. acrocentric chromosomes [108] because Robertsonian fusion

chromosomes (fusions of two acrocentric chromosomes into one metacentric) can behave like meiotic drivers and segregate preferentially into the future egg during meiosis I [115].

Other features of meiosis may be adaptations to suppress killer or meiotic drive SGEs. Such adaptations are expected, because these elements are generally costly for the rest of the genome [e.g. 104,116]. Defence against killer elements can be achieved by limiting gene expression. Accordingly, meiotic sex chromosome inactivation has been proposed to have evolved to control sex chromosome meiotic drive elements [117], and more generally this same principle may explain limited gene expression during meiosis and in its haploid products, as well as sharing of RNA and proteins among these cells. There is also evidence for rapid evolution and positive selection in the DNA-binding regions of centromere-associated proteins, which accords with the expectation of selection for countermeasures to limit preferential segregation of centromere drive elements towards the egg [102,112]. The evolution of holokinetic chromosomes may be an extreme form of defence against centromere drive [102].

## 4. Meiosis and recombination.

An ubiquitous feature of meiosis is the exchange of genetic material between homologous chromosomes. Whilst we have discussed arguments on its origin (see section 1.2), the maintenance of recombination is even more debated [118–120]. Here, we do not review this question, but discuss the evolutionary significance of patterns of recombination variation within and across species, as these present many mysteries connected to the functioning of meiosis.

### 4.1 The number of crossovers per chromosome: constrained or not?

In many species, the number of COs per bivalent appears to follow highly constrained patterns. Within species, the correlation between genetic map length (in cM, with 50 cM being equivalent to 1 CO per bivalent) and physical length (in megabases, Mb) per chromosome is very strong ( $R^2 > 0.95$ ) [121–126], and often has an intercept of ~50 cM, consistent with occurrence of one obligate CO per bivalent. There is direct evidence indicating that non-crossover bivalents have an increased probability of non-disjunction, resulting in unviable or unfit aneuploid offspring [127,128]. Indeed, COs establish physical connections between homologues, promoting accurate disjunction by providing the tension needed for the bipolar spindle to establish [129–131]. Therefore, this constraint has likely led to the evolution of regulation of CO numbers per bivalent

across the eukaryotes [132,133]. However, the reasons underlying the evolutionary persistence of this constraint are not well understood. In several species [e.g., *Arabidopsis*, 134], the intercept is less than 50cM; in addition, many species are achiasmate (i.e. have an absence of recombination) in one sex [135], with alternative mechanisms to ensure proper disjunction of achiasmate bivalents [136,137], indicating that CO is not obligatory.

In addition to the obligate CO, additional CO events can occur within bivalents. The strong cM-Mb relationship within species indicates that the number of surplus COs correlates well with physical chromosome size. However, the rate at which surplus COs are added per Mb (i.e. the slope of the correlation) varies strongly between species [126,138,139]. This may be partly explained by selection for different CO rates in different species [140–142]. The strong correlations observed within most species may be explained by variation in trans-acting factors, such as the locus *RNF212* and its protein, which affects the propensity for DSBs to form surplus COs [143,144]; indeed, the identification of loci affecting variation in CO rates indicates the potential for rapid evolution of CO rates within and between species [145].

A further constraint on bivalent disjunction may exist: The separation of different bivalents on the meiotic spindle may need to be collectively synchronised to avoid aneuploidy. If the number of COs correlates with the amount of tension exerted on the homologues, then a tight control of excess COs may minimise disjunction asynchrony. This hypothesis might account for the observation that some disjunction problems in humans occur in a global manner without involving effects driven by specific chromosomes [146–148]. Generally high CO numbers are, on the other hand, not necessarily problematic with respect to proper disjunction [149,150].

## 4.2 Crossover interference.

Crossover interference, where a CO in one position strongly reduces the likelihood of another CO occurring in the vicinity and/or on the same bivalent, meaning that the distribution of multiple COs are non-random, is widespread [139,149,151,152]; however, its function and mechanistic basis remains largely unknown. In many species, two classes of COs have been identified: Class I COs, which are sensitive to interference; and Class II COs, which are not [153]. Class I COs are thought to play a major role in ensuring obligate COs, and so interference may limit the frequency or variance of COs,

which may be important in ensuring proper disjunction [154]. A variant of this idea is that interference is a mechanism to avoid COs occurring in close proximity, which might reduce cohesion between homologs [155] or might slip and cancel each other out, resulting in no CO occurring [156]; however, these mechanisms do not explain long-distance interference. Finally, it has been suggested that CO interference may be adaptive by breaking up genetic associations. First, adjacent COs may be avoided because they cancel their effects on genetic associations [157]. Second, it has been speculated that CO interference may reduce the chances of breaking up co-adapted gene complexes (supergenes) [154]. Some support for the idea that CO interference is not a purely mechanistic constraint comes from the fact that some species lack interference [151] and, more importantly, that there is some evidence suggesting that interference levels evolve in long-term evolution experiments in *Drosophila* [158].

#### 4.3 Differences in recombination rates between the sexes.

In many species, CO rates and localisation differ between male and female meioses, and can differ in degree and direction even between closely related species [159–161]. The most extreme case is achiasmy, an absence of recombination in one sex, nearly always the heterogametic sex [159]. This may have evolved either as a side effect of selection to suppress recombination between the sex chromosomes [162,163], or as a way to promote tight linkage without suppressing recombination on the X or Z chromosomes [160]. More intriguing are the quantitative differences between males and females, known as heterochiasmy, which are found in many taxa, but whose mechanistic and evolutionary drivers are not yet fully understood. A number of explanations have been proposed, relating to mechanistic factors such as differences in chromatin structure [164–166], sexual dimorphism in the action of loci associated with CO rate [e.g. RNF212, 122,123,144], and evolutionarily widespread processes such as sperm competition, sexual dimorphism and dispersal [159,167,168]. However, models point to a role of sex differences in selection during the haploid phase [169]. Whilst a viable explanation in plants [160], there is little empirical support for this in animals [168], in which meiosis in females is only completed after fertilisation, so there is no true haploid phase, and the small number of expressed genes in sperm. However, meiotic drive systems are often entirely distinct between males and females [170] and may be a primary cause of haploid selection [171]. These systems often require genetic associations between two loci (a distorter and responder, or a distorter and a centromere in males and females, respectively). These driving elements might thus be very important in shaping

heterochiasmy patterns [103]. Indeed, COs in female meiosis are located closer to centromeres, which would be consistent with the view that this localisation evolved to limit centromeric drive [172] (see also section 3.4).

#### 4.4 The localisation of COs and recombination hotspots.

The localisation of recombination events differs between species. In many species, recombination occurs in localised regions known as “recombination hotspots” of around 1-2kb in length [173–176], although some species (e.g., *C. elegans* and *Drosophila*) lack well-defined hotspots [177,178]. There are at least two types of hotspots. The first type, probably ancestral, is found in fungi, plants, birds and some mammals; these hotspots are temporally stable (up to millions of years) and concentrated near promoter regions and transcription start sites [175,179–182]. The second type is likely derived, and is found in other mammals, including mice and humans, where the positioning of hotspots is determined by the zinc-finger protein PRDM9. This system differs in two respects from the former: first, it appears to direct DSBs away from regulatory regions [183], and second, mutations in the DNA-binding zinc-finger array change the sequence motif targeted by the protein, leading to rapid evolution of hotspot positions over short time-scales [184,185]. This system is not present in all mammals: in dogs, hotspots target promoter regions [186], and the knock-out of Prdm9 in mouse makes recombination target promoter regions instead, underlining its derived nature [183].

The evolutionary significance of both kinds of hotspots remains unclear. For the first type, the positions of hotspots may be caused by chromatin accessibility in transcribed regions, or, have evolved to favour recombination in gene rich regions (where it might be worth reducing genetic association). However, this does not clearly account for their precise location in regulatory regions. Another possibility might be that the co-occurrence of both COs and gene conversion events (i.e. where resolution of DSBs without CO is achieved by exchanging small segments of DNA) specifically in regulatory regions could repress enhancer runaway, a mechanism that can lead to suboptimal expression levels [187]. The evolutionary significance of the second kind of hotspots is similarly elusive. These hotspots are self-destructing because the target sequence motifs are eroded by biased gene conversion (BGC) during DSB repair [188]. This leads to a “hotspot paradox”: how can hotspots and recombination be maintained in the long term in the face of BGC [189]? A possible solution is that trans-acting factors like PRDM9 may mutate sufficiently fast to constantly ‘chase’ new and frequent targets (hotspots), switching to new ones when these targets become rare due to BGC [190]. This ‘Red



Queen' model does not require strong stabilising selection on the number of COs, and closely mimics the pattern of hotspot turnover observed in some cases [191]. However, this model does not explain how the second kind of hotspots evolved in the first place, as when it arose proper segregation was presumably already ensured by the first kind of hotspots (which, as seen in mice, are still active). Also, it does not explain why PRDM9 action is self-destructing: there is no necessity to induce DSBs exactly at the position of the target sequence for a trans-acting factor. In fact, there is no logical necessity to rely on a target sequence to maintain one CO per chromosome, as a fixed chromosomal feature could serve this purpose. It is worth noting here that recruiting promoter sequences for this purpose (as found for hotspots of the first kind) would be very efficient, as these sequences are highly stable and dispersed in the genome on all chromosomes. Overall, while spectacular progress has been made recently in elucidating hotspot mechanisms in detail (and patterns in recombination landscapes), there are still major gaps in our understanding of their evolutionary significance.

## 5 Conclusions.

The evolutionary significance of meiosis is often viewed through the direct (for DSB repair, or proper disjunction) or indirect (reducing genetic associations) effect of recombination. Whilst this dichotomy is far from solving all meiosis mysteries, recent advances in all detailed aspects of meiosis now offer the chance to investigate this question in a far more comprehensive manner. This will require continued dialogue between cell and evolutionary biologists [as advocated e.g. in 192]. A recurrent theme in most meiosis mysteries is the impact of genetic conflicts and SGEs. As for many genomic features, their impact is probably central [193], but in many cases, they remain hypothetical and difficult to study directly. Many SGEs reach fixation quickly and leave almost no visible footprint. Studying the mechanisms that presumably evolved to control SGEs still adds a further challenge, making it difficult to rule out alternative, more mechanistic and simpler effects, whilst still offering few insights on the origins of mechanistic constraints. Although meiosis is highly conserved in eukaryotes, deviations from the norm are ubiquitous and may provide important insights into its evolution. This is already apparent when considering model organisms (e.g., point centromeres in yeast, achiasmy in male *Drosophila*, holokinetic chromosomes in *C. elegans*, fast evolving recombination hotspots in mice and humans), but the true diversity is likely to be revealed only when considering non-model organisms, with protists representing much of eukaryotes diversity being especially promising. Obtaining a clearer evolutionary

significance of the myriad of meiotic features will certainly help and guide mechanistic investigations. Conversely, as often, “*all theory is grey, but green is the tree of life*” [Goethe, Faust Part I], and the mysteries of meiosis call for new developments of evolutionary theory. Overall, all these mysteries tend to have been overshadowed by the famous question of the maintenance of sex. However, resolving them might provide decisive steps towards solving this major question of evolutionary biology.

## Authors' Contributions

T.L. conceived and co-ordinated the review. All authors contributed to and approved this manuscript.

## Competing Interests

We have no competing interests.

## Acknowledgement

We thank Deborah Charlesworth for comments on a draft of this manuscript. Our intention was to cover all meiosis-related evolutionary mysteries in a single perspective. We apologize to all authors of the many interesting and relevant papers we were unable to cite in the final condensed version.

## References

1. Maynard Smith, J. 1978 *The evolution of sex*.
2. Hamilton, W. D. 2001 *Narrow roads of gene land: Volume 2: Evolution of sex*. Oxford: Oxford Univ. Press.
3. Knoll, a H., Javaux, E. J., Hewitt, D. & Cohen, P. 2006 Eukaryotic organisms in Proterozoic oceans. *Philos. Trans. R. Soc. Lond. B. Biol. Sci.* **361**, 1023–1038.
4. Douzery, E. J. P., Snell, E. a, Baptiste, E., Delsuc, F. & Philippe, H. 2004 The timing of eukaryotic evolution: does a relaxed molecular clock reconcile proteins and fossils? *Proc. Natl. Acad. Sci. U. S. A.* **101**, 15386–15391.
5. Cavalier-Smith, T. 2002 Origins of the machinery of recombination and sex. *Heredity* **88**, 125–141.
6. Ramesh, M., Malik, S.-B. & Logsdon, J. J. 2005 A Phylogenomic Inventory of Meiotic Genes: Evidence for Sex in Giardia and an Early Eukaryotic Origin of Meiosis. *Curr. Biol.* **15**, 185–191.
7. Speijer, D., Lukeš, J. & Eliáš, M. 2015 Sex is a ubiquitous, ancient, and inherent attribute of eukaryotic life. *Proc. Natl. Acad. Sci. U. S. A.* **112**, 8827–34.
8. Cleveland, L. 1947 The origin and evolution of meiosis. *Sci* **105**, 287–289.
9. Wilkins, A. S. & Holliday, R. 2009 The evolution of meiosis from mitosis. *Genetics* **181**, 3–12.
10. Hurst, L. & Nurse, P. 1991 A note on the evolution of meiosis. *J. Theor. Biol.*
11. Margulis, L. & Sagan, D. 1990 *Origins of Sex: Three Billion Years of Genetic Recombination*. Yale University Press.
12. Maynard Smith, J. & Szathmari, E. 1995 *The Major Transitions in Evolution*. Oxford: Oxford Univ. Press.
13. Mable, B. K. & Otto, S. P. 1998 The evolution of life cycles with haploid and diploid phases. *BioEssays* **20**, 453–462.
14. Rescan, M., Lenormand, T. & Roze, D. 2016 Interactions between genetic and ecological effects on the evolution of life cycles. *Am. Nat.* **187**, 19–34.
15. Souza-Júnior, S. A., Becker, T. C. A. & Castro-Prado, M. A. A. 2007 Asexual recombination in a *uvrH* mutant of *aspergillus nidulans*. *Biol. Res.* **40**, 65–71.
16. Parfrey, L. W., Lahr, D. J. G. & Katz, L. A. 2008 The dynamic nature of eukaryotic genomes. *Mol. Biol. Evol.* **25**, 787–794.
17. Otto, S. P. & Goldstein, D. B. 1992 Recombination and the evolution of diploidy. *Genetics* **131**, 745–751.
18. Hickey, D. A. & Rose, M. R. 1988 The role of gene transfer in the evolution of eukaryotic sex. In *The evolution of sex* (eds M. RE & L. BR), pp. 161–175. Sunderland, MA: Sinauer Associates.
19. Rusche, L. N. & Rine, J. 2010 Switching the mechanism of mating type switching: A domesticated transposase supplants a domesticated homing endonuclease. *Genes Dev.* **24**, 10–14.
20. Kleckner, N. 1996 Meiosis: How could it work? *Proc. Natl. Acad. Sci. U. S. A.* **93**, 8167–8174.
21. Baudat, F., Imai, Y. & de Massy, B. 2013 Meiotic recombination in mammals: localization and regulation. *Nat. Rev.*

- Genet.* **14**, 794–806.
22. Marcon, E. & Moens, P. B. 2005 The evolution of meiosis: Recruitment and modification of somatic DNA-repair proteins. *BioEssays* **27**, 795–808.
23. White, M. F. 2011 Homologous recombination in the archaea: the means justify the ends. *Biochem. Soc. Trans.* **39**, 15–9.
24. Birdsell, J. & Wills, C. 2003 The evolutionary origin and maintenance of sexual recombination: a review of contemporary models. In *Evolutionary Biology* (eds R. MacIntyre & M. Clegg), pp. 27–138. Kluwer Academic/Plenum Publishers.
25. Heng, H. H. Q. 2007 Elimination of altered karyotypes by sexual reproduction preserves species identity. *Genome* **50**, 517–24.
26. Sasaki, M., Lange, J. & Keeney, S. 2010 Genome destabilization by homologous recombination in the germ line. *Nat. Rev. Mol. Cell Biol.* **11**, 182–95.
27. Arkhipova, I. & Meselson, M. 2005 Deleterious transposable elements and the extinction of asexuals. *BioEssays* **27**, 76–85.
28. Bernstein, H., Hopf, F. A. & Michod, R. E. 1988 Is meiotic recombination and adaptation for repairing DNA, producing genetic variation, or both? In *The evolution of sex* (eds R. E. Michod & B. R. Levin), pp. 139–160. Sunderland, MA: Sinauer.
29. Bernstein, H., Bernstein, C. & Michod, R. E. 2011 Meiosis as an Evolutionary Adaptation for DNA Repair. *Meiosis as an Evol. Adapt. DNA Repair*, 357–382.
30. Hörandl, E. & Hadacek, F. 2013 The oxidative damage initiation hypothesis for meiosis. *Plant Reprod.* **26**, 351–367.
31. Maynard-Smith, J. 1988 The evolution of recombination. In *The evolution of sex* (eds R. E. Michod & B. R. Levin), pp. 106–125. Sunderland, MA: Sinauer associates.
32. Hurst, L. D. 1993 Drunken walk of the diploid. *Nature* **365**, 206–207.
33. Archetti, M. 2004 Loss of complementation and the logic of two-step meiosis. *J. Evol. Biol.* **17**, 1084–1097.
34. Haig, D. & Grafen, A. 1991 Genetic scrambling as a defence against meiotic drive. *J. theor. Biol.* **153**, 531–558.
35. Haig, D. 1993 Alternatives to meiosis: the unusual genetics of red algae, microsporidia, and others. *J. theor. Biol.* **163**, 15–31.
36. Hurst, L. D. & Randerson, J. P. 2000 Transitions in the evolution of meiosis. *J. Evol. Biol.* **13**, 466–479.
37. Wijnker, E. & Schnittger, A. 2013 Control of the meiotic cell division program in plants. *Plant Reprod.* **26**, 143–58.
38. Raikov, I. B. 1982 *The protozoan nucleus -- morphology and evolution*. Vienna: Springer-Verlag.
39. Raikov, I. B. 1995 Meiosis in protists: Recent advances and persisting problems. *Eur. J. Protistol.* **31**, 1–7.
40. Grandont, L., Jenczewski, E. & Lloyd, A. 2013 Meiosis and its Deviations in Polyploids. *Cytogenet. Genome Res.* **140**, 171–184.
41. Stenberg, P. & Saura, A. 2013 Meiosis and its deviations in polyploid animals. *Cytogenet. Genome Res.* **140**, 185–203.
42. Lloyd, A. & Bomblies, K. 2016 Meiosis in autopolyploid and allopolyploid Arabidopsis. *Curr. Opin. Plant Biol.* **30**, 116–122.
43. Madlung, A., Tyagi, A. P., Watson, B., Jiang, H., Kagochi, T., Doerge, R. W., Martienssen, R. & Comai, L. 2005 Genomic changes in synthetic Arabidopsis polyploids. *Plant J.* **41**, 221–230.
44. Gaeta, R. T., Pires, J. C., Iniguez-Luy, F., Leon, E. & Osborn, T. C. 2007 Genomic changes in resynthesized Brassica napus and their effect on gene expression and phenotype. *Plant Cell* **19**, 3403–3417.
45. Wang, Y., Jha, A. K., Chen, R., Doonan, J. H. & Yang, M. 2010 Polyploidy-associated genomic instability in Arabidopsis thaliana. *Genesis* **48**, 254–263.
46. Gaeta, R. T. & Chris Pires, J. 2010 Homoeologous recombination in allopolyploids: The polyploid ratchet. *New Phytol.* **186**, 18–28.
47. Santos, J. L., Alfaro, D., Sanchez-Moran, E., Armstrong, S. J., Franklin, F. C. H. & Jones, G. H. 2003 Partial Diploidization of Meiosis in Autotetraploid Arabidopsis thaliana. *Genetics* **165**, 1533–1540.
48. Yant, L., Hollister, J. D., Wright, K. M., Arnold, B. J., Higgins, J. D., Franklin, F. C. H. & Bomblies, K. 2013 Meiotic Adaptation to Genome Duplication in Arabidopsis arenosa. *Curr. Biol.* **23**, 2151–2156.
49. Cifuentes, M., Grandont, L., Moore, G., Chèvre, A. M. & Jenczewski, E. 2010 Genetic regulation of meiosis in polyploid species: New insights into an old question. *New Phytol.* **186**, 29–36.
50. Le Comber, S. C., Ainouche, M. L., Kovarik, A. & Leitch, A. R. 2010 Making a functional diploid: From polysomic to disomic inheritance. *New Phytol.* **186**, 113–122.
51. Griffiths, S., Sharp, R., Foote, T. N., Bertin, I., Wanous, M., Reader, S., Colas, I. & Moore, G. 2006 Molecular characterization of Ph1 as a major chromosome pairing locus in polyploid wheat. *Nature* **439**, 749–52.
52. Hollister, J. D., Arnold, B. J., Svedin, E., Xue, K. S., Dilkes, B. P. & Bomblies, K. 2012 Genetic Adaptation Associated with Genome-Doubling in Autotetraploid Arabidopsis arenosa. *PLoS Genet.* **8**.
53. St Charles, J., Hamilton, M. L. & Petes, T. D. 2010 Meiotic chromosome segregation in triploid strains of Saccharomyces cerevisiae. *Genetics* **186**, 537–550.
54. Lim, K. Y. et al. 2005 Evolutionary implications of permanent odd polyploidy in the stable sexual, pentaploid of Rosa canina L. *Heredity* **94**, 501–506.
55. Pazy, B. & Plitmann, U. 1991 Unusual chromosome separation in meiosis of Cuscuta L. *Genome* **10**, 533–536.
56. Heckmann, S., Jankowska, M., Schubert, V., Kumke, K., Ma, W. & Houben, A. 2014 Alternative meiotic chromatid segregation in the holocentric plant Luzula elegans. *Nat. Commun.* **5**, 4979.
57. Cabral, G., Marques, A., Schubert, V., Pedrosa-Harand, A. & Schlögelhofer, P. 2014 Chiasmatic and achiasmatic inverted meiosis of plants with holocentric chromosomes. *Nat. Commun.* **5**, 5070.
58. Wensch, D. L., Kethley, J. & Norton, R. A. 1994 Cytogenetics of Holokinetic Chromosomes and Inverted Meiosis : Keys to the Evolutionary Success of Mites , with Generalizations on Eukaryotes. *Mites Ecol. Evol. Anal. Life-History Patterns*, 282–343.
59. John, B. 1990 *Meiosis*. Cambridge: Cambridge University Press.
60. Bongiorno, S., Fiorenzo, P., Pippoletti, D. & Pranter, G. 2004 Inverted meiosis and meiotic drive in mealybugs. *Chromosoma* **112**, 331–341.
61. Melters, D. P., Paliulis, L. V., Korf, I. F. & Chan, S. W. L. 2012 Holocentric chromosomes: Convergent evolution, meiotic adaptations, and genomic analysis. *Chromosom. Res.* **20**, 579–593.
62. Mira, a 1998 Why is meiosis arrested? *J. Theor. Biol.* **194**, 275–87.
63. Ottolini, C. S. et al. 2015 Genome-wide maps of recombination and chromosome segregation in human oocytes and

- embryos show selection for maternal recombination rates. *Nat. Genet.* **47**, 727–735.
64. Mogie, M. 1986 Automixis: its distribution and status. *Biol. J. Linn. Soc.* **28**, 321–329.
65. Suomalainen, E., Saura, A. & Lokki, J. 1987 *Cytology and evolution in parthenogenesis*. Boca Raton FL: CRC Press.
66. Stenberg, P. & Saura, A. 2009 Cytology of Asexual Animals. In *Lost sex. The evolutionary biology of parthenogenesis* (eds I. Schön K. Martens & P. van Dijk), pp. 63–74. Dordrecht, The Netherlands: Springer Science.
67. Archetti, M. 2010 Complementation, genetic conflict, and the evolution of sex and recombination. *J. Hered.* **101**, 1–13.
68. Neiman, M. & Schwander, T. 2011 Using Parthenogenetic Lineages to Identify Advantages of Sex. *Evol. Biol.* **38**, 115–123.
69. Nougé, O., Rode, N., Zahab, R., Ségard, A., Chevin, L.-M., Haag, C. R. & Lenormand, T. 2015 Automixis in *Artemia*: solving a century-old problem. *J. Evol. Biol.* **In press**.
70. van Dijk, P. J. 2009 Apomixis: Basics for non-botanists. In *Lost sex. The evolutionary biology of parthenogenesis* (eds I. Schön K. Martens & P. J. van Dijk), pp. 47–62. Dordrecht, The Netherlands: Springer Science.
71. Asher, J. H. 1970 Parthenogenesis and genetic variability. II. One-locus models for various diploid populations. *Genetics* **66**, 369–391.
72. Percy, M., Hardy, O. & Aron, S. 2006 Thelytokous parthenogenesis and its consequences on inbreeding in an ant. *Heredity* **96**, 377–382.
73. Engelstädter, J., Sandrock, C. & Vorburger, C. 2011 Contagious parthenogenesis, automixis, and a sex determination meltdown. *Evolution* **65**, 501–511.
74. Engelstädter, J. 2008 Constraints on the evolution of asexual reproduction. *BioEssays* **30**, 1138–1150.
75. Svendsen, N. et al. 2015 Uncovering cryptic asexuality in *Daphnia magna* by RAD-sequencing. *Genetics* **201**, 1143–1155.
76. Archetti, M. 2004 Recombination and loss of complementation: a more than two-fold cost for parthenogenesis. *J. Evol. Biol.* **17**, 1084–1097.
77. Schwander, T. & Crespi, B. J. 2009 Multiple direct transitions from sexual reproduction to apomictic parthenogenesis in Timema stick insects. *Evolution* **63**, 84–103.
78. Baudry, E., Kryger, P., Allsopp, M., Koeniger, N., Vautrin, D., Mougél, F., Cornuet, J.-M. & Solignac, M. 2004 Whole-genome scan in thelytokous-laying workers of the Cape honeybee (*Apis mellifera capensis*): Central fusion, reduced recombination rates and centromere mapping using half-tetrad analysis. *Genetics* **167**, 243–252.
79. Lutes, A. a, Neves, W. B., Baumann, D. P., Wiegraebe, W. & Baumann, P. 2010 Sister chromosome pairing maintains heterozygosity in parthenogenetic lizards. *Nature* **464**, 283–286.
80. Bell, G. 1982 The Masterpiece of Nature: the Evolution and Genetics of Sexuality.
81. Neiman, M., Sharbel, T. F. & Schwander, T. 2014 Genetic causes of transitions from sexual reproduction to asexuality in plants and animals. *J. Evol. Biol.* **27**, 1346–59.
82. Hiruta, C., Nishida, C. & Tochinai, S. 2010 Abortive meiosis in the oogenesis of parthenogenetic *Daphnia pulex*. *Chromosom. Res.* **18**, 833–840.
83. Miura, T., Braendle, C., Shingleton, A., Sisk, G., Kambhampati, S. & Stern, D. L. 2003 A comparison of parthenogenetic and sexual embryogenesis of the pea aphid *Acyrtosiphon pisum* (Hemiptera: Aphidoidea). *J. Exp. Zool. B. Mol. Dev. Evol.* **295**, 59–81.
84. van Baarlen, P., van Dijk, P. J., Hoekstra, R. F. & de Jong, J. H. 2000 Meiotic recombination in sexual diploid and apomictic triploid dandelions (*Taraxacum officinale* L.). *Genome* **43**, 827–835.
85. Nunney, L. 1989 The maintenance of sex by group selection. *Evolution* **43**, 245–257.
86. Simon, J.-C., Rispe, C. & Sunnucks, P. 2002 Ecology and evolution of sex in aphids. *Trends Ecol. Evol.* **17**, 34–39.
87. Schwander, T., Vuilleumier, S., Dubman, J. & Crespi, B. J. 2010 Positive feedback in the transition from sexual reproduction to parthenogenesis. *Proc. Biol. Sci.* **277**, 1435–42.
88. Marimuthu, M. P. A. et al. 2011 Synthetic clonal reproduction through seeds. *Science* **331**, 876.
89. D’Erforth, I., Jolivet, S., Froger, N., Catrice, O., Novatchkova, M. & Mercier, R. 2009 Turning meiosis into mitosis. *PLoS Biol.* **7**.
90. Ravi, M., Marimuthu, M. P. a & Siddiqi, I. 2008 Gamete formation without meiosis in Arabidopsis. *Nature* **451**, 1121–1124.
91. Masui, Y. 2000 The elusive cytostatic factor in the animal egg. *Nat. Rev. Mol. Cell Biol.* **1**, 228–32.
92. Kishimoto, T. 2003 Cell-cycle control during meiotic maturation. *Curr. Opin. Cell Biol.* **15**, 654–663.
93. Extavour, C. 2009 Oogenesis: Making the Mos of Meiosis. *Curr. Biol.* **19**, R489–R491.
94. Sagata, N. 1996 Meiotic metaphase arrest in animal oocytes: Its mechanisms and biological significance. *Trends Cell Biol.* **6**, 22–28.
95. Gorelick, R. & Carpinone, J. 2009 Origin and maintenance of sex: The evolutionary joys of self sex. *Biol. J. Linn. Soc.* **98**, 707–728.
96. Heard, E. & Martienssen, R. A. 2014 Transgenerational epigenetic inheritance: Myths and mechanisms. *Cell* **157**, 95–109.
97. Zamudio, N., Barau, J., Teissandier, A., Walter, M., Borsos, M., Servant, N. & Bourc’his, D. 2015 DNA methylation restrains transposons from adopting a chromatin signature permissive for meiotic recombination. *Genes Dev.* **29**, 1256–70.
98. Soper, S. F. C., Heijden, G. W. Van Der, Hardiman, T. C., Martin, S. L., Boer, P. De & Bortvin, A. 2008 Mouse Maelstrom, a component of nuage, is essential for spermatogenesis and transposon repression in meiosis. *Dev. Cell.* **15**, 285–297.
99. Claycomb, J. M. 2014 Ancient endo-siRNA pathways reveal new tricks. *Curr. Biol.* **24**, R703–R715.
100. Castel, E. & Martienssen, R. 2013 RNA interference (RNAi) in the Nucleus: roles for small RNA in transcription, epigenetics and beyond. *Nat. Rev. Genet.* **14**, 100–112.
101. Schuh, M. & Ellenberg, J. 2008 A New Model for Asymmetric Spindle Positioning in Mouse Oocytes. *Curr. Biol.* **18**, 1986–1992.
102. Malik, H. S. & Henikoff, S. 2009 Major Evolutionary Transitions in Centromere Complexity. *Cell* **138**, 1067–1082.
103. Haig, D. 2010 Games in tetrads: segregation, recombination, and meiotic drive. *Am. Nat.* **176**, 404–413.
104. Jaenike, J. 2001 Sex chromosome meiotic drive. *Annu. Rev. Ecol. Syst.* **32**, 25–49.
105. Burt, A. & Trivers, R. 2006 *Genes in Conflict: The Biology of Selfish Genetic Elements*. Boston: Harvard University Press.
106. Larracuente, A. M. & Presgraves, D. C. 2012 The selfish Segregation Distorter gene complex of *Drosophila*



- melanogaster. *Genetics* **192**, 33–53.
107. Lindholm, A. K. et al. 2016 The ecology and evolutionary dynamics of meiotic drive. *Trends Ecol. Evol.* **31**, 315–326.
108. Pardo-Manuel De Villena, F. & Sapienza, C. 2001 Nonrandom segregation during meiosis: The unfairness of females. *Mamm. Genome* **12**, 331–339.
109. Haig, D. 1996 Gestational drive and the green-bearded placenta. *Proc. Natl. Acad. Sci. U. S. A.* **93**, 6547–6551.
110. Haig, D. 2014 Coadaptation and conflict, misconception and muddle, in the evolution of genomic imprinting. *Heredity* **113**, 96–103.
111. Okasha, S. 2012 Social Justice, Genomic Justice and the Veil of Ignorance: Harsanyi Meets Mendel. *Econ. Philos.* **28**, 43–71.
112. Henikoff, S., Ahmad, K. & Malik, H. S. 2001 The centromere paradox: Stable inheritance with rapidly evolving DNA. *Science* **293**, 1098–1102.
113. Fishman, L. 2013 Female meiotic drive in monkeyflowers: insight into the population genetics of selfish centromeres. In *Plant Centromere Biology* (eds J. Jiang & J. A. Birchler), pp. 129–145. Oxford, UK: Wiley-Blackwell.
114. Fishman, L. & Saunders, A. 2008 Centromere-associated female meiotic drive entails male fitness costs in monkeyflowers. *Science* **322**, 1559–1562.
115. Chmátal, L., Gabriel, S. I., Mitsainas, G. P., Martínez-Vargas, J., Ventura, J., Searle, J. B., Schultz, R. M. & Lampson, M. A. 2014 Centromere strength provides the cell biological basis for meiotic drive and karyotype evolution in mice. *Curr. Biol.* **24**, 2295–300.
116. Fishman, L. & Kelly, J. K. 2015 Centromere-associated meiotic drive and female fitness variation in *Mimulus*. *Evolution* **69**, 1208–1218.
117. Tao, Y., Araripe, L., Kingan, S. B., Ke, Y., Xiao, H. & Hartl, D. L. 2007 A sex-ratio meiotic drive system in *Drosophila simulans*. II: An X-linked distorter. *PLoS Biol.* **5**, 2576–2588.
118. Barton, N. H. & Charlesworth, B. 1998 Why sex and recombination? *Science* **281**, 1986–1990.
119. Otto, S. P. & Lenormand, T. 2002 Resolving the paradox of sex and recombination. *Nat. Rev. Genet.* **3**, 252–261.
120. Otto, S. P. 2009 The Evolutionary Enigma of Sex. *Am. Nat.* **174**, S1–S14.
121. Kong, X., Murphy, K., Raj, T., He, C., White, P. S. & Matise, T. C. 2004 A combined linkage-physical map of the human genome. *Am. J. Hum. Genet.* **75**, 1143–1148.
122. Johnston, S. E., Berenos, C., Slate, J. & Pemberton, J. M. 2016 Conserved Genetic Architecture Underlying Individual Recombination Rate Variation in a Wild Population of Soay sheep (*Ovis aries*). *Genetics*, 1–47.
123. Ma, L. et al. 2015 Cattle Sex-Specific Recombination and Genetic Control from a Large Pedigree Analysis. *PLoS Genet.* **11**, 1–24.
124. Kawakami, T., Smeds, L., Backström, N., Husby, A., Qvarnström, A., Mugal, C. F., Olason, P. & Ellegren, H. 2014 A high-density linkage map enables a second-generation collared flycatcher genome assembly and reveals the patterns of avian recombination rate variation and chromosomal evolution. *Mol. Ecol.* **23**, 4035–4058.
125. Groenen, M. A. M. et al. 2009 A high-density SNP-based linkage map of the chicken genome reveals sequence features correlated with recombination rate. *Genome Res.* **19**, 510–519.
126. Li, W. & Freudenberger, J. 2009 Two-parameter characterization of chromosome-scale recombination rate. *Genome Res.* **19**, 2300–2307.
127. Nagaoka, S. I., Hassold, T. J. & Hunt, P. a 2012 Human aneuploidy: mechanisms and new insights into an age-old problem. *Nat. Rev. Genet.* **13**, 493–504.
128. Hassold, T., Hall, H. & Hunt, P. 2007 The origin of human aneuploidy: Where we have been, where we are going. *Hum. Mol. Genet.* **16**, 203–208.
129. Petronczki, M., Siomos, M. F. & Nasmyth, K. 2003 Un ménage à quatre: The molecular biology of chromosome segregation in meiosis. *Cell*. **112**, 423–440.
130. Hirose, Y., Suzuki, R., Ohba, T., Hinohara, Y., Matsuhara, H., Yoshida, M., Itabashi, Y., Murakami, H. & Yamamoto, A. 2011 Chiasmata promote monopolar attachment of sister chromatids and their co-segregation toward the proper pole during meiosis I. *PLoS Genet.* **7**, e1001329.
131. Hunter, N. 2015 Meiotic recombination: The essence of heredity. *Cold Spring Harb. Perspect. Biol.* **7**.
132. Hunt, P. a 2006 Meiosis in mammals: recombination, non-disjunction and the environment. *Biochem. Soc. Trans.* **34**, 574–577.
133. Hassold, T. & Hunt, P. 2001 To err (meiotically) is human: the genesis of human aneuploidy. *Nat. Rev. Genet.* **2**, 280–91.
134. Giraut, L., Falque, M., Drouaud, J., Pereira, L., Martin, O. C. & Mézard, C. 2011 Genome-wide crossover distribution in *Arabidopsis thaliana* meiosis reveals sex-specific patterns along chromosomes. *PLoS Genet.* **7**.
135. Bell, G. 1982 *The masterpiece of nature: the evolution and genetics of sexuality*. Berkeley: University of California Press.
136. Hawley, S. & Theurkauf, W. 1993 Requiem for distributive segregation: achiasmate segregation in *Drosophila* females. *Trends Genet.* **9**, 310–316.
137. Krishnaprasad, G. N., Anand, M. T., Lin, G., Tekkedil, M. M., Steinmetz, L. M. & Nishant, K. T. 2015 Variation in Crossover Frequencies Perturb Crossover Assurance Without Affecting Meiotic Chromosome Segregation in *Saccharomyces cerevisiae*. *Genetics* **199**, 399–412.
138. Fledel-Alon, A., Wilson, D. J., Broman, K., Wen, X., Ober, C., Coop, G. & Przeworski, M. 2009 Broad-scale recombination patterns underlying proper disjunction in humans. *PLoS Genet.* **5**, e1000658.
139. Mercier, R., Mézard, C., Jenczewski, E., Macaisne, N. & Grelon, M. 2015 The Molecular Biology of Meiosis in Plants. *Annu. Rev. Plant Biol.* **66**, 141210140145001–.
140. Wilfert, L., Gadau, J. & Schmid-Hempel, P. 2007 Variation in genomic recombination rates among animal taxa and the case of social insects. *Heredity* **98**, 189–197.
141. Ross, L., Blackmon, H., Lorite, P., Gokhman, V. E. & Hardy, N. B. 2015 Recombination, chromosome number and eusociality in the Hymenoptera. *J. Evol. Biol.* **28**, 105–116.
142. Dumont, B. L., White, M. a, Steffy, B., Dumont, B. L., White, M. a, Steffy, B., Wiltshire, T. & Payseur, B. a 2011 Extensive recombination rate variation in the house mouse species complex inferred from genetic linkage maps. *Genome Res.* **21**, 114–125.
143. Reynolds, A. et al. 2013 RNF212 is a dosage-sensitive regulator of crossing-over during mammalian meiosis. *Nat Genet* **45**, 269–278.
144. Kong, A. et al. 2014 Common and low-frequency variants associated with genome-wide recombination rate. *Nat.*

- Genet.* **46**, 11–6.
145. Hunter, C. M., Huang, W., Mackay, T. F. C. & Singh, N. D. 2016 The Genetic Architecture of Natural Variation in Recombination Rate in *Drosophila melanogaster*. *PLoS Genet.* **12**, e1005951.
146. Brown, A., Feingold, E., Broman, K. & Sherman, S. 2000 Genome-wide variation in recombination in female meiosis: a risk factor for non-disjunction of chromosome 21. *Hum. Mol. Genet.* **9**, 515–523.
147. Louis, E. J. & Borts, R. H. 2003 Meiotic Recombination: Too Much of a Good Thing? *Curr. Biol.* **13**, R953–R955.
148. Hassold, T., Sherman, S. & Hunt, P. 2000 Counting cross-overs: characterizing meiotic recombination in mammals. *Hum Mol Genet* **9**, 2409–2419.
149. Hunter, N., Flemming, W. & Boveri, T. 2015 Meiotic Recombination : The Essence of Heredity.
150. Séguéla-Arnaud, M. et al. 2015 Multiple mechanisms limit meiotic crossovers: TOP3 $\alpha$  and two BLM homologs antagonize crossovers in parallel to FANCM. *Proc. Natl. Acad. Sci. U. S. A.* **112**, 4713–8.
151. Berchowitz, L. E. & Copenhaver, G. P. 2010 Genetic interference: don't stand so close to me. *Curr. Genomics* **11**, 91–102.
152. Hillers, K. J. 2004 Crossover interference. *Curr. Biol.* **14**, R1036–R1037.
153. Housworth, E. A. & Stahl, F. W. 2003 Crossover Interference in Humans. *Am. J. Hum. Genet.* **73**, 188–197.
154. Wang, S., Zickler, D., Kleckner, N. & Zhang, L. 2015 and homeostasis in a single process. , 305–314.
155. Van Veen, J. E. & Hawley, R. S. 2003 Meiosis: When even Two Is a Crowd. *Curr. Biol.* **13**, 831–833.
156. Maguire, M. P. 1988 Crossover site determination and interference. *J. Theor. Biol.* **134**, 565–70.
157. Goldstein, D. B., Bergman, A. & Feldman, M. W. 1993 The evolution of interference: reduction of recombination among three loci. *Theor. Popul. Biol.* **44**, 246–259.
158. Aggarwal, D. D., Rashkovetsky, E., Michalak, P., Cohen, I., Ronin, Y., Zhou, D., Haddad, G. G. & Korol, A. B. 2015 Experimental evolution of recombination and crossover interference in *Drosophila* caused by directional selection for stress-related traits. *BMC Biol.* **13**, 101.
159. Burt, A., Bell, G. & Harvey, P. H. 1991 Sex differences in recombination. *J. Evol. Biol.* **4**, 259–277.
160. Lenormand, T. & Dutheil, J. 2005 Recombination difference between sexes: a role for haploid selection. *PLoS Biol.* **3**, 396–403.
161. Hedrick, P. W. 2007 Sex: Differences in mutation, recombination, selection, gene flow, and genetic drift. *Evolution* **61**, 2750–2771.
162. Haldane, J. B. S. 1922 Sex ratio and unisexual sterility in hybrid animals. *J. Genet.* **12**, 101–109.
163. Huxley, J. S. 1928 Sexual difference of linkage in *Gammarus chevreuxi*. *J. Genet.* **20**, 145–156.
164. Gruhn, J. R., Al-Asmar, N., Fasnacht, R., Maylor-Hagen, H., Peinado, V., Rubio, C., Broman, K. W., Hunt, P. A. & Hassold, T. 2015 Correlations between Synaptic Initiation and Meiotic Recombination: A Study of Humans and Mice. *Am. J. Hum. Genet.* **98**, 102–115.
165. Petkov, P. M., Broman, K. W., Szatkiewicz, J. P. & Paigen, K. 2007 Crossover interference underlies sex differences in recombination rates. *Trends Genet.* **23**, 539–542.
166. Morelli, M. A. & Cohen, P. E. 2005 Not all germ cells are created equal: Aspects of sexual dimorphism in mammalian meiosis. *Reproduction* **130**, 761–781.
167. Burt, A. 2000 Perspective: sex, recombination and the efficacy of selection : was Weismann right? *Evolution* **54**, 337–351.
168. Mank, J. E. 2009 The evolution of heterochiasmy: the role of sexual selection and sperm competition in determining sex-specific recombination rates in eutherian mammals. *Genet. Res.* **91**, 355–363.
169. Lenormand, T. 2003 The evolution of sex dimorphism in recombination. *Genetics* **163**, 811–822.
170. Úbeda, F. & Haig, D. 2005 On the evolutionary stability of Mendelian segregation. *Genetics* **170**, 1345–1357.
171. Joseph, S. B. & Kirkpatrick, M. 2004 Haploid selection in animals. *Trends Ecol. Evol.* **19**, 592–597.
172. Brandvain, Y. & Coop, G. 2012 Scrambling eggs: meiotic drive and the evolution of female recombination rates. *Genetics* **190**, 709–23.
173. Paigen, K. & Petkov, P. 2010 Mammalian recombination hot spots: properties, control and evolution. *Nat. Rev. Genet.* **11**, 221–33.
174. de Massy, B. 2013 Initiation of meiotic recombination: how and where? Conservation and specificities among eukaryotes. *Annu. Rev. Genet.* **47**, 563–99.
175. Choi, K. & Henderson, I. R. 2015 Meiotic recombination hotspots - A comparative view. *Plant J.* **83**, 52–61.
176. Keeney, S. 2008 Spo11 and the Formation of DNA Double-Strand Breaks in Meiosis. *Genome Dyn. Stab.* **2**, 81–123.
177. Kaur, T. & Rockman, M. V. 2014 Crossover heterogeneity in the absence of hotspots in *Caenorhabditis elegans*. *Genetics* **196**, 137–148.
178. Comeron, J. M., Ratnappan, R. & Bailin, S. 2012 The Many Landscapes of Recombination in *Drosophila melanogaster*. *PLoS Genet.* **8**, 33–35.
179. Pan, J. et al. 2011 A hierarchical combination of factors shapes the genome-wide topography of yeast meiotic recombination initiation. *Cell* **144**, 719–731.
180. Choi, K. et al. 2013 Arabidopsis meiotic crossover hot spots overlap with H2A.Z nucleosomes at gene promoters. *Nat. Genet.* **45**, 1327–36.
181. Singhal, S. et al. 2015 Stable recombination hotspots in birds. *Science* **350**, 928–32.
182. Wijnker, E. et al. 2013 The genomic landscape of meiotic crossovers and gene conversions in *Arabidopsis thaliana*. *Elife* **2013**, 1–22.
183. Brick, K., Smagulova, F., Khil, P., Camerini-Otero, R. D. & Petukhova, G. V 2012 Genetic recombination is directed away from functional genomic elements in mice. *Nature* **485**, 642–5.
184. Baudat, F., Buard, J., Grey, C., Flédel-Alon, A., Ober, C., Przeworski, M., Coop, G. & de Massy, B. 2010 PRDM9 Is a Major Determinant of Meiotic Recombination Hotspots in Humans and Mice. *Science* **327**, 836–840.
185. Stevison, L. S., Woerner, A. E., Kidd, J. M., Kelley, J. L., Veeramah, K. R., McManus, K. F., Bustamante, C. D., Hammer, M. F. & Wall, J. D. 2016 The Time Scale of Recombination Rate Evolution in Great Apes. *Mol. Biol. Evol.* **33**, 928–45.
186. Auton, A. et al. 2013 Genetic Recombination Is Targeted towards Gene Promoter Regions in Dogs. *PLoS Genet.* **9**, e1003984.
187. Fyon, F., Cailleau, A. & Lenormand, T. 2015 Enhancer Runaway and the Evolution of Diploid Gene Expression. *PLoS Genet.* **11**, e1005665.
188. Jeffreys, A. J. & Neumann, R. 2002 Reciprocal crossover asymmetry and meiotic drive in a human recombination hot

- spot. *Nat. Genet.* **31**, 267–71.
189. Boulton, A., Myers, R. S. & Redfield, R. J. 1997 The hotspot conversion paradox and the evolution of meiotic recombination. *Proc. Natl. Acad. Sci.* **94**, 8058–8063.
190. Úbeda, F. & Wilkins, J. F. 2011 The Red Queen theory of recombination hotspots. *J. Evol. Biol.* **24**, 541–553.
191. Lesecque, Y., Glémin, S., Lartillot, N., Mouchiroud, D. & Duret, L. 2014 The Red Queen Model of Recombination Hotspots Evolution in the Light of Archaic and Modern Human Genomes. *PLoS Genet.* **10**, 1–14.
192. Lynch, M., Field, M. C., Goodson, H. V., Malik, H. S., Pereira-Leal, J. B., Roos, D. S., Turkewitz, A. P. & Sazer, S. 2014 Evolutionary cell biology: two origins, one objective. *Proc. Natl. Acad. Sci. U. S. A.* **111**, 16990–4.
193. Rice, W. R. 2013 Nothing in Genetics Makes Sense Except in Light of Genomic Conflict. *Annu. Rev. Ecol. Evol. Syst.* **44**, 217–237.
